# Supplementary material for: Optimisation of the electrochemical performance of (Nd,Gd)1/3Sr2/3CoO3−δ cathode for solid oxide fuel cells via spray-pyrolysis deposition and decoration with Ag nanoparticles
Source: Royal Society of Chemistry journal article supplement (doi:10.1039/d3ta05917k), 2024-01-01
Supplement: d3ta05917k1.pdf [file d3ta05917k1.pdf]

## SUPPLEMENTARY INFORMATION

### **Optimisation of the electrochemical performance of (Nd,Gd)<sub>1/3</sub>Sr<sub>2/3</sub>CoO<sub>3-δ</sub> cathode for solid oxide fuel cells via spray-pyrolysis deposition and decoration with Ag nanoparticles**

Paula Rosendo Santos,<sup>a</sup> Domingo Pérez-Coll,<sup>b</sup> M. Teresa Azcondo,<sup>a</sup> Glenn C. Mather,<sup>b</sup> Álvaro Muñoz-Noval,<sup>c,d</sup> Eduardo Salas-Colera,<sup>c,e</sup> Ulises Amador,<sup>a</sup> Khalid Boulahya,<sup>f</sup> and Daniel Muñoz-Gil,<sup>\*,b,f</sup>

<sup>a</sup> Universidad San Pablo-CEU, CEU Universities, Facultad de Farmacia, Departamento de Química y Bioquímica, Urbanización Montepríncipe, Boadilla del Monte, 28668, Madrid, Spain

<sup>b</sup> Instituto de Cerámica y Vidrio (ICV), CSIC, C/Kelsen, 5, 28049 Madrid, Spain

<sup>c</sup> SpLine Spanish CRG Beamline, ESRF, 6 Rue J. Horowitz, Grenoble, Isere/Rhone-Alpes, 38042, France.

<sup>d</sup> Departamento de Física de Materiales, Facultad de Físicas, Universidad Complutense de Madrid, 28040, Madrid, Spain.

<sup>e</sup> Instituto de Ciencia de Materiales de Madrid (ICMM), CSIC, Sor Juana Inés de la Cruz, 3, 28049, Madrid, Spain

<sup>f</sup> Departamento de Química Inorgánica I, Facultad de Ciencias Químicas, Universidad Complutense, 28040, Madrid, Spain

\*Corresponding author: [dmunozgi@ucm.es](mailto:dmunozgi@ucm.es)

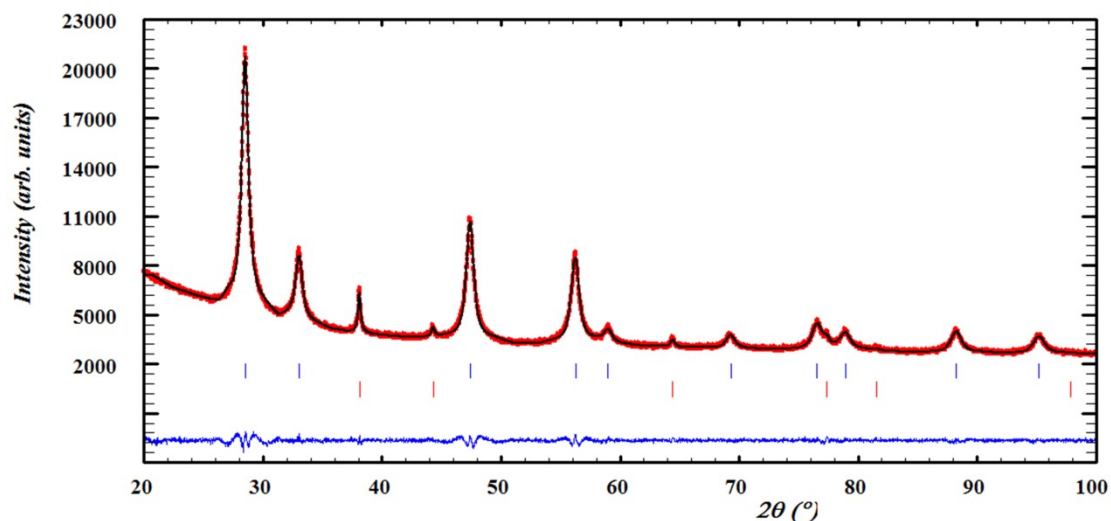

**Figure S1:** X-ray diffraction pattern of CGO:Ag nanocomposite with weight ratio 90:10. Red circles correspond to the observed pattern, the black solid line to the calculated pattern and their difference is shown as a blue line at the bottom. Positions of Bragg peaks are indicated by vertical bars for CGO (first row) and Ag (second row).

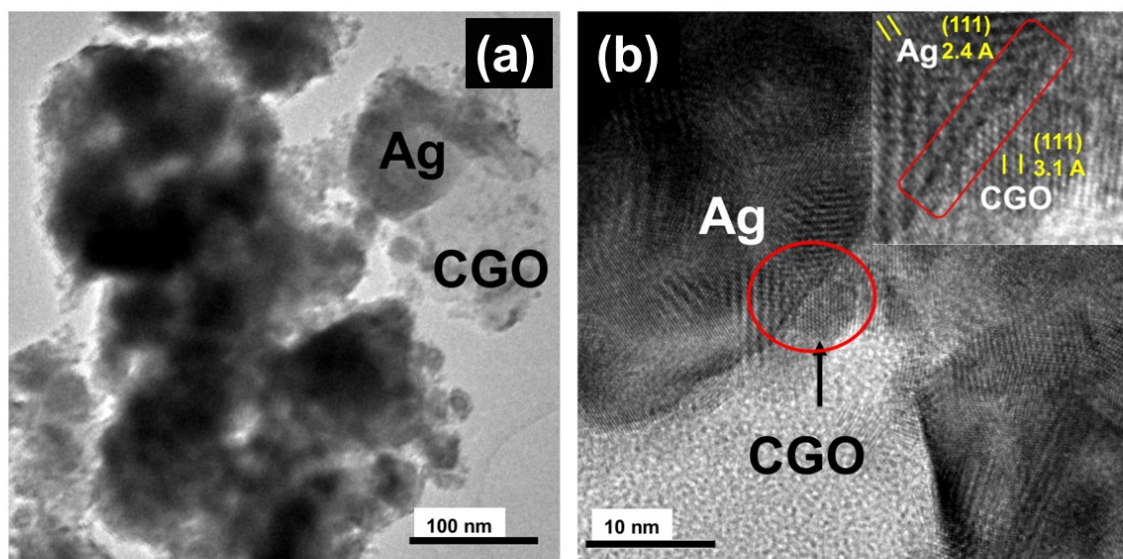

**Figure S2:** Low and high magnification TEM images ((a) and (b), respectively) of CGO:Ag nanocomposite with weight ratio 90:10. A zoomed view of the CGO/Ag interphase is shown in the inset of (b); relevant d-spacings of both phases are indicated.

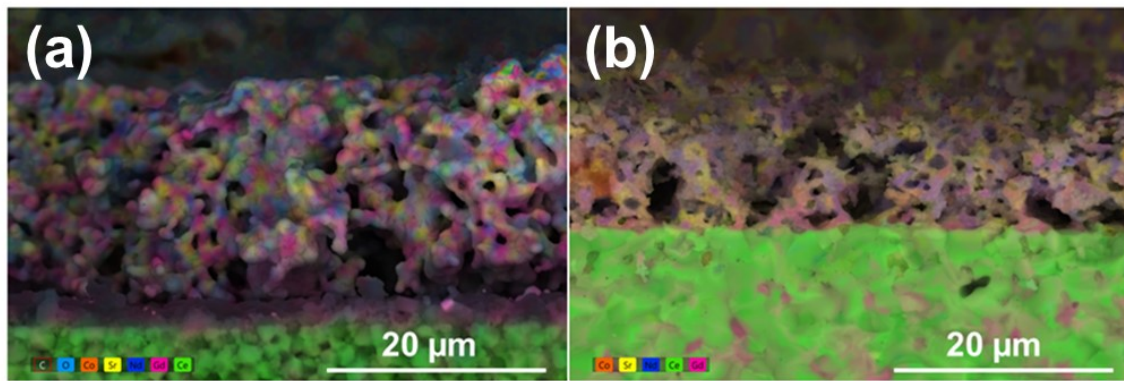

**Figure S3:** Elemental distribution determined by EDS in SEM for  $(\text{Nd,Gd})_{1/3}\text{Sr}_{2/3}\text{CoO}_{3-\delta}:\text{Ce}_{0.9}(\text{Gd,Nd})_{0.1}\text{O}_{1.95}$  electrodes obtained by (a) slurry coating and (b) spray-pyrolysis. The colour used for the identification of the elements: green-Ce; purple-Gd; blue-Nd; yellow-Sr and orange-Co.

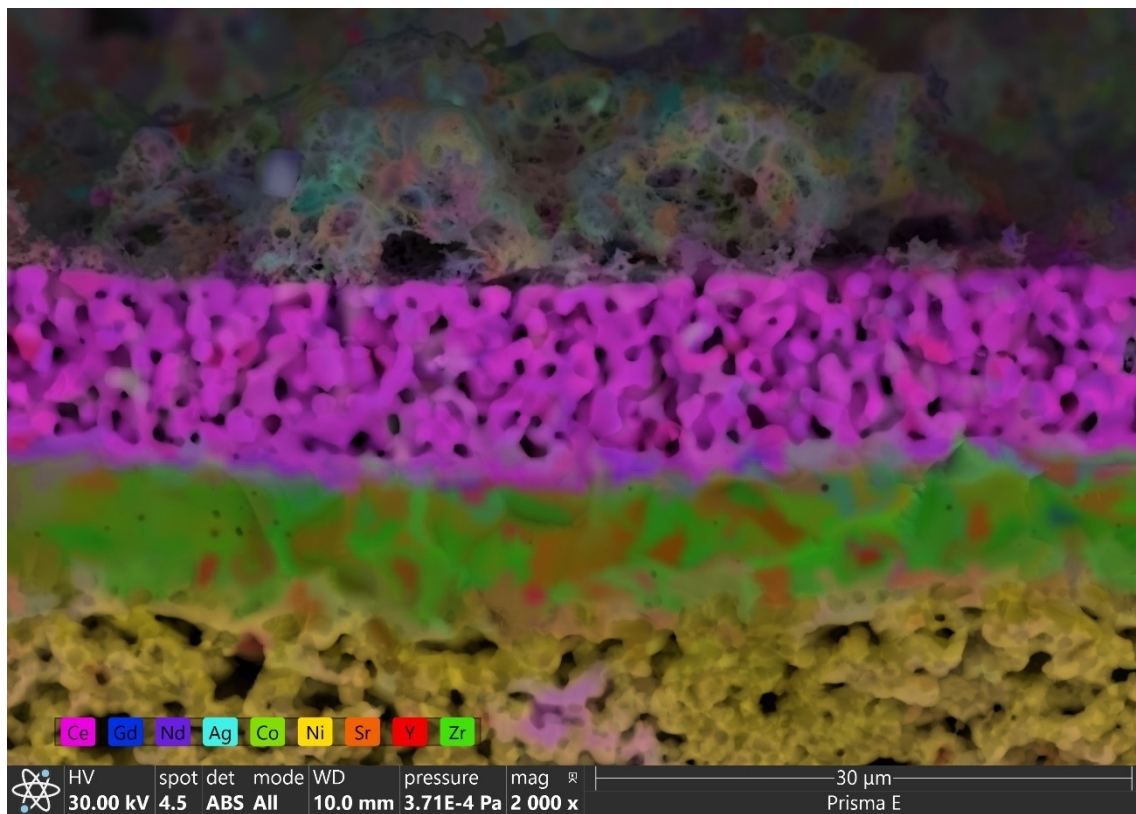

**Figure S4.** Elemental distribution determined by EDS in SEM for a single cell of NiO-CGO/YSZ/CGO/ $(\text{Nd,Gd})_{1/3}\text{Sr}_{2/3}\text{CoO}_{3-\delta}:\text{Ce}_{0.9}(\text{Gd,Nd})_{0.1}\text{O}_{1.95}:\text{Ag}$  after testing in SOFC mode. There is no evidence of microstructural deterioration attributable to grain coarsening or cracking of the layers.

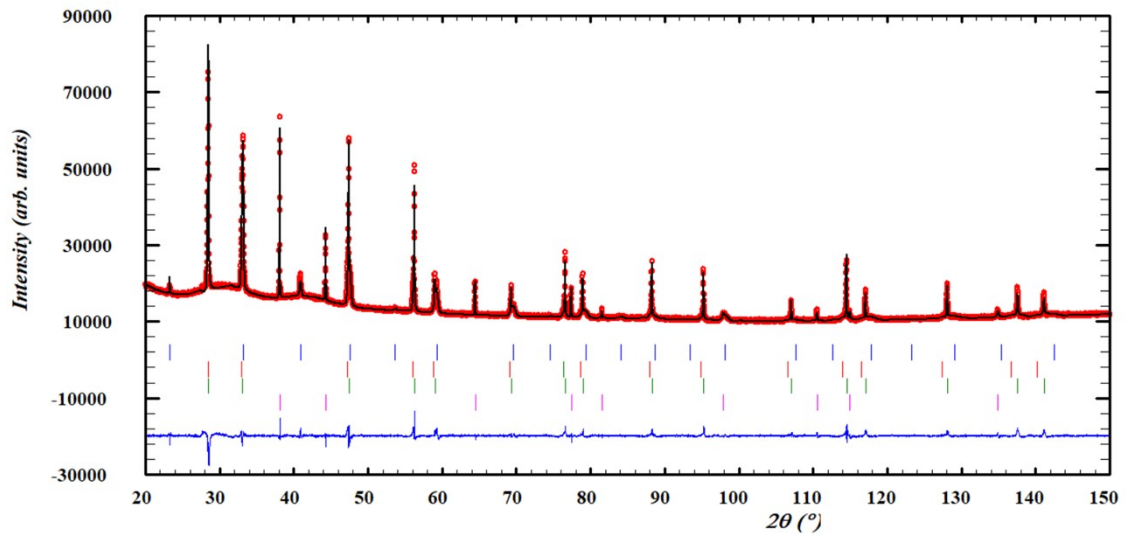

**Figure S5.** Experimental (red points), calculated (solid black line) and their difference (blue line at bottom) laboratory XRD patterns at room temperature of the cathode post-operation of a single SOFC with configuration Ni-CGO/YSZ/CGO/ $(\text{Nd,Gd})_{1/3}\text{Sr}_{2/3}\text{CoO}_{3-\delta}:\text{Ce}_{0.9}(\text{Gd,Nd})_{0.1}\text{O}_{1.95}:\text{Ag}$ . The X-ray beam penetrates just to the CGO buffer layer (the YSZ and the anode layers in Fig. S4 are not detected). The vertical bars indicate the positions of peaks corresponding to  $(\text{Nd,Gd})_{1/3}\text{Sr}_{2/3}\text{CoO}_{3-\delta}$  (blue),  $\text{Ce}_{0.9}(\text{Gd,Nd})_{0.1}\text{O}_{1.95}$  in the composite electrode (red), CGO in the buffer layer (green) and Ag in the composite (fuchsia).

## Calculation of the shell thickness of the core-shell structure of AgNPs in the as-obtained composites

Nanoparticles have a large surface-to-volume ratio, which increases with decreasing particle radius,  $r$  (assuming spherical shape):

$$\frac{S}{V} = \frac{4\pi r^2}{4\pi r^3/3} = \frac{3}{r} \quad (1)$$

The volume of the oxide shell depends on the particle radius, where  $\Delta r$  is the shell radius:

$$V_{shell} = \frac{4}{3}\pi[(r + \Delta r)^3 - r^3] \quad (2)$$

The mass ratio between the phases present in the nanoparticles ( $A=Ag_2O/Ag$ ) is given by:

$$A = \frac{M_{shell}}{M_{core}} = \frac{\rho(Ag_2O)[(r + \Delta r)^3 - r^3]}{r^3\rho(Ag)} \quad (3)$$

which includes the densities of the two phases.

In Eq. 3 there are two unknown quantities: the radius of the metal particles,  $r$ , and the thickness of the oxide layer,  $\Delta r$ .

Using the densities of both phases (7.14 g/cm<sup>3</sup> for Ag<sub>2</sub>O and 10.49 g/cm<sup>3</sup> for Ag), the particle size determined by XRD and HRTEM ( $r = 80$  nm) and the mass ratio obtained from the fittings of the XANES spectrum ( $A = 15/85$ ), we derive a cubic equation, with only one real solution for  $\Delta r$  as 0.54(5) nm. Thus, the outer particles shell consists of 1 unit cell of Ag<sub>2</sub>O (whose unit cell parameter is 0.473 nm).<sup>1</sup>

## References

1. P. Norby, R. Dinnebier, and A.N. Fitch, *Inorg. Chem.*, 2002. **41**(14), 3628-3637.

**Table S1.** Structural and microstructural parameters obtained from XRD data for  $(\text{Nd,Gd})_{1/3}\text{Sr}_{2/3}\text{CoO}_{3-\delta}:\text{Ce}_{0.9}(\text{Gd,Nd})_{0.1}\text{O}_{1.95}$  composite prepared by spray pyrolysis and deposited by slurry coating.

| Sample                                                                                                                                                                                                                                                                                                                                                                                                           | $(\text{Nd,Gd})_{1/3}\text{Sr}_{2/3}\text{CoO}_{3-\delta}:\text{Ce}_{0.9}(\text{Gd,Nd})_{0.1}\text{O}_{1.95}$ (SC) |                              |                       |
|------------------------------------------------------------------------------------------------------------------------------------------------------------------------------------------------------------------------------------------------------------------------------------------------------------------------------------------------------------------------------------------------------------------|--------------------------------------------------------------------------------------------------------------------|------------------------------|-----------------------|
| <b>Phase</b>                                                                                                                                                                                                                                                                                                                                                                                                     | $(\text{Nd,Gd})_{1/3}\text{Sr}_{2/3}\text{CoO}_{3-\delta}$ <sup>a</sup>                                            |                              |                       |
| <b>Space Group</b>                                                                                                                                                                                                                                                                                                                                                                                               | Pm-3m                                                                                                              |                              |                       |
| <b>a (Å)</b>                                                                                                                                                                                                                                                                                                                                                                                                     | 3.81869 (3)                                                                                                        |                              |                       |
| <b>Volume (Å<sup>3</sup>)</b>                                                                                                                                                                                                                                                                                                                                                                                    | 55.686(1)                                                                                                          |                              |                       |
| <b>A position</b>                                                                                                                                                                                                                                                                                                                                                                                                | 1b                                                                                                                 | <b>O1 position</b>           | 3d                    |
| <b>Occ Sr/(Nd+Gd)</b>                                                                                                                                                                                                                                                                                                                                                                                            | 0.67(1)/0.33(1)                                                                                                    | <b>Occ</b>                   | 0.968(3)              |
| <b>U*100 (Å<sup>2</sup>)</b>                                                                                                                                                                                                                                                                                                                                                                                     | 0.15(2)                                                                                                            | <b>U*100 (Å<sup>2</sup>)</b> | 1.12(5)               |
| <b>B position</b>                                                                                                                                                                                                                                                                                                                                                                                                | 1a                                                                                                                 |                              |                       |
| <b>Occ Co</b>                                                                                                                                                                                                                                                                                                                                                                                                    | 1                                                                                                                  |                              |                       |
| <b>U*100 (Å<sup>2</sup>)</b>                                                                                                                                                                                                                                                                                                                                                                                     | 0.10(6)                                                                                                            |                              |                       |
| <b>Crystallite size (nm)</b>                                                                                                                                                                                                                                                                                                                                                                                     | 71.89(5)                                                                                                           |                              |                       |
| <b>Phase</b>                                                                                                                                                                                                                                                                                                                                                                                                     | $\text{Ce}_{0.9}(\text{Gd,Nd})_{0.1}\text{O}_{1.95}$ <sup>b</sup>                                                  |                              |                       |
| <b>Space Group</b>                                                                                                                                                                                                                                                                                                                                                                                               | Fm-3m                                                                                                              |                              |                       |
| <b>a (Å)</b>                                                                                                                                                                                                                                                                                                                                                                                                     | 5.43462(4)                                                                                                         |                              |                       |
| <b>Volume (Å<sup>3</sup>)</b>                                                                                                                                                                                                                                                                                                                                                                                    | 160.512(2)                                                                                                         |                              |                       |
| <b>A position</b>                                                                                                                                                                                                                                                                                                                                                                                                | 4a                                                                                                                 | <b>O1 position</b>           | 8c                    |
| <b>Occ Ce/(Gd+Nd)</b>                                                                                                                                                                                                                                                                                                                                                                                            | 0.90/0.10                                                                                                          | <b>Occ</b>                   | 0.976(3)              |
| <b>U*100 (Å<sup>2</sup>)</b>                                                                                                                                                                                                                                                                                                                                                                                     | 0.06(1)                                                                                                            | <b>U*100 (Å<sup>2</sup>)</b> | 0.32(4)               |
| <b>Crystallite size (nm)</b>                                                                                                                                                                                                                                                                                                                                                                                     | 51.23(2)                                                                                                           |                              |                       |
| <sup>a</sup> Pm-3m (#221): 1a (000), 1b (½ ½ ½), 3d (½ 0 0)<br>Composition: $(\text{Nd,Gd})_{0.33(1)}\text{Sr}_{0.67(1)}\text{CoO}_{2.904(6)}$<br>$R_B = 1.86\%$<br><sup>b</sup> Fm-3m (#225): 4a (000), 8c (¼ ¼ ¼)<br>Composition: $\text{Ce}_{0.90}(\text{Gd,Nd})_{0.10}\text{O}_{1.952(6)}$<br>$R_B = 1.78\%$ ,<br>$\chi^2 = 1.59$ , $R_{wp} = 1.36\%$ , $R_{exp} = 1.08\%$ ,<br>Phase percentage (weight %): |                                                                                                                    |                              |                       |
|                                                                                                                                                                                                                                                                                                                                                                                                                  |                                                                                                                    |                              | NSC 69(1) : CGO 31(1) |

**Table S2.** Structural and microstructural parameters obtained from XRD data for  $(\text{Nd,Gd})_{1/3}\text{Sr}_{2/3}\text{CoO}_{3-\delta}:\text{Ce}_{0.9}(\text{Gd,Nd})_{0.1}\text{O}_{1.95}$  composite prepared and deposited by spray pyrolysis.

| Sample                                                                                                                                                           | $(\text{Nd,Gd})_{1/3}\text{Sr}_{2/3}\text{CoO}_{3-\delta}:\text{Ce}_{0.9}(\text{Gd,Nd})_{0.1}\text{O}_{1.95}$ (SP) |                         |          |
|------------------------------------------------------------------------------------------------------------------------------------------------------------------|--------------------------------------------------------------------------------------------------------------------|-------------------------|----------|
| Phase                                                                                                                                                            | $(\text{Nd,Gd})_{1/3}\text{Sr}_{2/3}\text{CoO}_{3-\delta}$ <sup>a</sup>                                            |                         |          |
| Space Group                                                                                                                                                      | Pm-3m                                                                                                              |                         |          |
| <i>a</i> (Å)                                                                                                                                                     | 3.81736 (3)                                                                                                        |                         |          |
| Volume (Å <sup>3</sup> )                                                                                                                                         | 55.627(1)                                                                                                          |                         |          |
| A position                                                                                                                                                       | 1b                                                                                                                 | O1 position             | 3d       |
| Occ Sr/(Nd+Gd)                                                                                                                                                   | 0.67(1)/0.33(1)                                                                                                    | Occ                     | 0.973(3) |
| U*100 (Å <sup>2</sup> )                                                                                                                                          | 0.05(1)                                                                                                            | U*100 (Å <sup>2</sup> ) | 1.52(4)  |
| B position                                                                                                                                                       | 1a                                                                                                                 |                         |          |
| Occ Co                                                                                                                                                           | 1                                                                                                                  |                         |          |
| U*100 (Å <sup>2</sup> )                                                                                                                                          | 0.10(6)                                                                                                            |                         |          |
| Crystallite size (nm)                                                                                                                                            | 65.16(2)                                                                                                           |                         |          |
| Phase                                                                                                                                                            | $\text{Ce}_{0.9}(\text{Gd,Nd})_{0.1}\text{O}_{1.95}$ <sup>b</sup><br>(composite)                                   |                         |          |
| Space Group                                                                                                                                                      | Fm-3m                                                                                                              |                         |          |
| <i>a</i> (Å)                                                                                                                                                     | 5.43162(8)                                                                                                         |                         |          |
| Volume (Å <sup>3</sup> )                                                                                                                                         | 160.246(4)                                                                                                         |                         |          |
| A position                                                                                                                                                       | 4a                                                                                                                 | O1 position             | 8c       |
| Occ Ce/(Gd+Nd)                                                                                                                                                   | 0.90/0.10                                                                                                          | Occ                     | 0.971(3) |
| U*100 (Å <sup>2</sup> )                                                                                                                                          | 0.04(1)                                                                                                            | U*100 (Å <sup>2</sup> ) | 0.41(4)  |
| Crystallite size (nm)                                                                                                                                            | 66.50(5)                                                                                                           |                         |          |
| Phase                                                                                                                                                            | $\text{Ce}_{0.9}\text{Gd}_{0.1}\text{O}_{1.95}$ <sup>c</sup> (pellet)                                              |                         |          |
| Space Group                                                                                                                                                      | Fm-3m                                                                                                              |                         |          |
| <i>a</i> (Å)                                                                                                                                                     | 5.41993(5)                                                                                                         |                         |          |
| Volume (Å <sup>3</sup> )                                                                                                                                         | 159.214(2)                                                                                                         |                         |          |
| A position                                                                                                                                                       | 4a                                                                                                                 | O1 position             | 8c       |
| Occ Ce/Gd                                                                                                                                                        | 0.90/0.10                                                                                                          | Occ                     | 0.973(3) |
| U*100 (Å <sup>2</sup> )                                                                                                                                          | 0.08(1)                                                                                                            | U*100 (Å <sup>2</sup> ) | 0.36(4)  |
| Crystallite size (nm)                                                                                                                                            | N/A                                                                                                                |                         |          |
| <sup>a</sup> Pm-3m (#221): 1a (000), 1b (½ ½ ½), 3d (½ 0 0)<br>Composition: $(\text{Nd,Gd})_{0.33(1)}\text{Sr}_{0.67(1)}\text{CoO}_{2.919(6)}$<br>$R_B = 1.53\%$ |                                                                                                                    |                         |          |
| <sup>b</sup> Fm-3m (#225): 4a (000), 8c (¼ ¼ ¼)<br>Composition: $\text{Ce}_{0.90}(\text{Gd,Nd})_{0.10}\text{O}_{1.942(6)}$<br>$R_B = 1.70\%$                     |                                                                                                                    |                         |          |
| <sup>c</sup> Fm-3m (#225): 4a (000), 8c (¼ ¼ ¼)<br>Composition: $\text{Ce}_{0.90}\text{Gd}_{0.10}\text{O}_{1.946(6)}$<br>$R_B = 1.42\%$                          |                                                                                                                    |                         |          |
| $\chi^2 = 1.47$ , $R_{wp} = 1.08\%$ , $R_{exp} = 0.89\%$ ,<br>Phase percentage in composite (weight %):                                                          |                                                                                                                    |                         |          |
| NSC 70(1) : CGO 30(1)                                                                                                                                            |                                                                                                                    |                         |          |

**Table S3.** Structural and microstructural parameters obtained from XRD data for  $(\text{Nd,Gd})_{1/3}\text{Sr}_{2/3}\text{CoO}_{3-\delta}:\text{Ce}_{0.9}(\text{Gd,Nd})_{0.1}\text{O}_{1.95}:\text{Ag}$  prepared and deposited by spray pyrolysis combustion method.

| Sample                                                                                                                                                                                                                                                                                                                                                                                                                                                                                                                                                                                                                                                                                                                                                                                                                           | $(\text{Nd,Gd})_{1/3}\text{Sr}_{2/3}\text{CoO}_{3-\delta}:\text{Ce}_{0.9}(\text{Gd,Nd})_{0.1}\text{O}_{1.95}:\text{Ag}$<br>(SP_Ag) |                         |          |
|----------------------------------------------------------------------------------------------------------------------------------------------------------------------------------------------------------------------------------------------------------------------------------------------------------------------------------------------------------------------------------------------------------------------------------------------------------------------------------------------------------------------------------------------------------------------------------------------------------------------------------------------------------------------------------------------------------------------------------------------------------------------------------------------------------------------------------|------------------------------------------------------------------------------------------------------------------------------------|-------------------------|----------|
| Phase                                                                                                                                                                                                                                                                                                                                                                                                                                                                                                                                                                                                                                                                                                                                                                                                                            | $(\text{Nd,Gd})_{1/3}\text{Sr}_{2/3}\text{CoO}_{3-\delta}$ <sup>a</sup>                                                            |                         |          |
| Space Group                                                                                                                                                                                                                                                                                                                                                                                                                                                                                                                                                                                                                                                                                                                                                                                                                      | Pm-3m                                                                                                                              |                         |          |
| <i>a</i> (Å)                                                                                                                                                                                                                                                                                                                                                                                                                                                                                                                                                                                                                                                                                                                                                                                                                     | 3.82290 (5)                                                                                                                        |                         |          |
| Volume (Å <sup>3</sup> )                                                                                                                                                                                                                                                                                                                                                                                                                                                                                                                                                                                                                                                                                                                                                                                                         | 55.870(3)                                                                                                                          |                         |          |
| A position                                                                                                                                                                                                                                                                                                                                                                                                                                                                                                                                                                                                                                                                                                                                                                                                                       | 1b                                                                                                                                 | O1 position             | 3d       |
| Occ Sr/(Nd+Gd)                                                                                                                                                                                                                                                                                                                                                                                                                                                                                                                                                                                                                                                                                                                                                                                                                   | 0.66(1)/0.33(1)                                                                                                                    | Occ                     | 0.967(3) |
| U*100 (Å <sup>2</sup> )                                                                                                                                                                                                                                                                                                                                                                                                                                                                                                                                                                                                                                                                                                                                                                                                          | 0.51(4)                                                                                                                            | U*100 (Å <sup>2</sup> ) | 1.48(4)  |
| B position                                                                                                                                                                                                                                                                                                                                                                                                                                                                                                                                                                                                                                                                                                                                                                                                                       | 1a                                                                                                                                 |                         |          |
| Occ Co                                                                                                                                                                                                                                                                                                                                                                                                                                                                                                                                                                                                                                                                                                                                                                                                                           | 1                                                                                                                                  |                         |          |
| U*100 (Å <sup>2</sup> )                                                                                                                                                                                                                                                                                                                                                                                                                                                                                                                                                                                                                                                                                                                                                                                                          | 0.08(2)                                                                                                                            |                         |          |
| Crystallite size (nm)                                                                                                                                                                                                                                                                                                                                                                                                                                                                                                                                                                                                                                                                                                                                                                                                            | 27.73(2)                                                                                                                           |                         |          |
| Phase                                                                                                                                                                                                                                                                                                                                                                                                                                                                                                                                                                                                                                                                                                                                                                                                                            | $\text{Ce}_{0.9}(\text{Gd,Nd})_{0.1}\text{O}_{1.95}$ <sup>b</sup><br>(composite)                                                   |                         |          |
| Space Group                                                                                                                                                                                                                                                                                                                                                                                                                                                                                                                                                                                                                                                                                                                                                                                                                      | Fm-3m                                                                                                                              |                         |          |
| <i>a</i> (Å)                                                                                                                                                                                                                                                                                                                                                                                                                                                                                                                                                                                                                                                                                                                                                                                                                     | 5.4387(1)                                                                                                                          |                         |          |
| Volume (Å <sup>3</sup> )                                                                                                                                                                                                                                                                                                                                                                                                                                                                                                                                                                                                                                                                                                                                                                                                         | 160.877(6)                                                                                                                         |                         |          |
| A position                                                                                                                                                                                                                                                                                                                                                                                                                                                                                                                                                                                                                                                                                                                                                                                                                       | 4a                                                                                                                                 | O1 position             | 8c       |
| Occ Ce/(Gd+Gd)                                                                                                                                                                                                                                                                                                                                                                                                                                                                                                                                                                                                                                                                                                                                                                                                                   | 0.90/0.10                                                                                                                          | Occ                     | 0.975(2) |
| U*100 (Å <sup>2</sup> )                                                                                                                                                                                                                                                                                                                                                                                                                                                                                                                                                                                                                                                                                                                                                                                                          | 0.14(2)                                                                                                                            | U*100 (Å <sup>2</sup> ) | 0.61(5)  |
| Crystallite size (nm)                                                                                                                                                                                                                                                                                                                                                                                                                                                                                                                                                                                                                                                                                                                                                                                                            | 68.20(4)                                                                                                                           |                         |          |
| Phase                                                                                                                                                                                                                                                                                                                                                                                                                                                                                                                                                                                                                                                                                                                                                                                                                            | Ag <sup>c</sup>                                                                                                                    |                         |          |
| Space Group                                                                                                                                                                                                                                                                                                                                                                                                                                                                                                                                                                                                                                                                                                                                                                                                                      | Fm-3m                                                                                                                              |                         |          |
| <i>a</i> (Å)                                                                                                                                                                                                                                                                                                                                                                                                                                                                                                                                                                                                                                                                                                                                                                                                                     | 4.09168(6)                                                                                                                         |                         |          |
| Volume (Å <sup>3</sup> )                                                                                                                                                                                                                                                                                                                                                                                                                                                                                                                                                                                                                                                                                                                                                                                                         | 68.502(2)                                                                                                                          |                         |          |
| Ag position                                                                                                                                                                                                                                                                                                                                                                                                                                                                                                                                                                                                                                                                                                                                                                                                                      | 4a                                                                                                                                 |                         |          |
| U*100 (Å <sup>2</sup> )                                                                                                                                                                                                                                                                                                                                                                                                                                                                                                                                                                                                                                                                                                                                                                                                          | 1.31(4)                                                                                                                            |                         |          |
| Crystallite size (nm)                                                                                                                                                                                                                                                                                                                                                                                                                                                                                                                                                                                                                                                                                                                                                                                                            | 150.32(5)                                                                                                                          |                         |          |
| Phase                                                                                                                                                                                                                                                                                                                                                                                                                                                                                                                                                                                                                                                                                                                                                                                                                            | $\text{Ce}_{0.9}\text{Gd}_{0.1}\text{O}_{1.95}$ <sup>d</sup> (pellet)                                                              |                         |          |
| Space Group                                                                                                                                                                                                                                                                                                                                                                                                                                                                                                                                                                                                                                                                                                                                                                                                                      | Fm-3m                                                                                                                              |                         |          |
| <i>a</i> (Å)                                                                                                                                                                                                                                                                                                                                                                                                                                                                                                                                                                                                                                                                                                                                                                                                                     | 5.42584(6)                                                                                                                         |                         |          |
| Volume (Å <sup>3</sup> )                                                                                                                                                                                                                                                                                                                                                                                                                                                                                                                                                                                                                                                                                                                                                                                                         | 159.735(3)                                                                                                                         |                         |          |
| A position                                                                                                                                                                                                                                                                                                                                                                                                                                                                                                                                                                                                                                                                                                                                                                                                                       | 4a                                                                                                                                 | O1 position             | 8c       |
| Occ Ce/Gd                                                                                                                                                                                                                                                                                                                                                                                                                                                                                                                                                                                                                                                                                                                                                                                                                        | 0.90/0.10                                                                                                                          | Occ                     | 0.971(4) |
| U*100 (Å <sup>2</sup> )                                                                                                                                                                                                                                                                                                                                                                                                                                                                                                                                                                                                                                                                                                                                                                                                          | 0.26(2)                                                                                                                            | U*100 (Å <sup>2</sup> ) | 0.42(5)  |
| Crystallite size (nm)                                                                                                                                                                                                                                                                                                                                                                                                                                                                                                                                                                                                                                                                                                                                                                                                            | N/A                                                                                                                                |                         |          |
| <sup>a</sup> Pm-3m (#221): 1a (000), 1b ( $\frac{1}{2} \frac{1}{2} \frac{1}{2}$ ), 3d ( $\frac{1}{2} 0 0$ )<br>Composition: $(\text{Nd,Gd})_{0.33(1)}\text{Sr}_{0.67(1)}\text{CoO}_{2.871(6)}$<br>R <sub>B</sub> = 3.85%<br><sup>b</sup> Fm-3m (#225): 4a (000), 8c ( $\frac{1}{4} \frac{1}{4} \frac{1}{4}$ )<br>Composition: $\text{Ce}_{0.90}(\text{Gd,Nd})_{0.10}\text{O}_{1.950(4)}$<br>R <sub>B</sub> = 5.54%,<br><sup>c</sup> Fm-3m (#225): 4a (000)<br>R <sub>B</sub> = 4.14%,<br><sup>d</sup> Fm-3m (#225): 4a (000), 8c ( $\frac{1}{4} \frac{1}{4} \frac{1}{4}$ )<br>Composition: $\text{Ce}_{0.90}\text{Gd}_{0.10}\text{O}_{1.942(4)}$<br>R <sub>B</sub> = 3.86%,<br>$\chi^2 = 5.31$ , R <sub>wp</sub> = 1.78%, R <sub>exp</sub> = 0.77%,<br>Phase percentage in composite (weight %): NSC 66(2) : CGO 25(2) : Ag 9(2) |                                                                                                                                    |                         |          |



**Table S4.** EXAFS parameters obtained from the fitting of spectra: N is the mean number of neighbours in each atomic shell, R is the atomic shell radius (Å),  $\sigma^2$  is the shell radius variance and  $\Delta E_0$  is the non-structural parameter related to the shift of the edge energy set for the fitting. The r-factor and  $\chi^2$  are quality-criteria parameters

| <b>Parameter</b>                       | <b>Bulk Ag</b> | <b>Ag in as-prepared composite (NPs)</b> |
|----------------------------------------|----------------|------------------------------------------|
| N(Ag-Ag)                               | 12 (1)         | 8(1)                                     |
| N(Ag-O)                                | ---            | 1(1)                                     |
| R(Ag-Ag)                               | 2.873(5)       | 2.861(6)                                 |
| R(Ag-O)                                | ---            | 2.028(6)                                 |
| $\sigma^2(\text{Ag-Ag})(\text{\AA}^2)$ | 0.0089 (5)     | 0.0075(7)                                |
| $\sigma^2(\text{Ag-O})(\text{\AA}^2)$  | ---            | 0.0111(10)                               |
| $\Delta E_0(\text{eV})$                | 5(1)           | 2 (2)                                    |
| r-factor                               | 0.001          | 0.002                                    |
| $\chi^2$                               | 85             | 110                                      |
